# Supplementary material
Source: publisher figshare collection journal article supplement (https://springernature.figshare.com/articles/dataset/_/7659749)

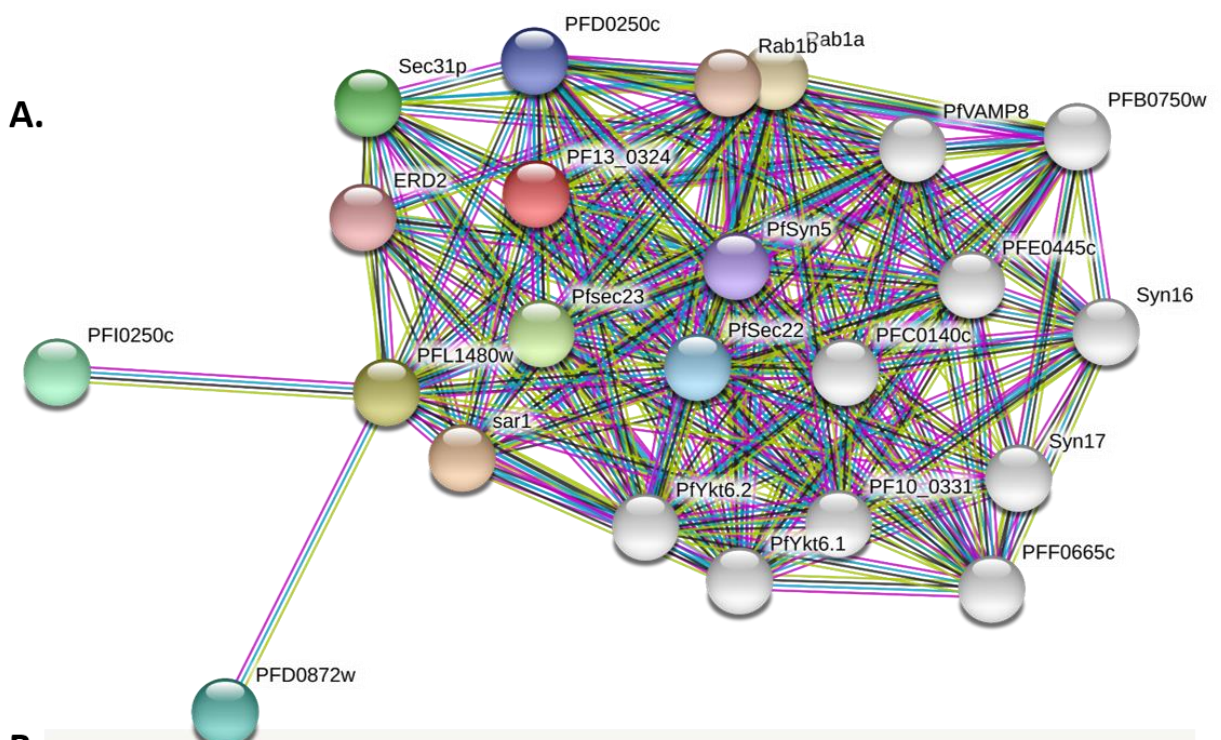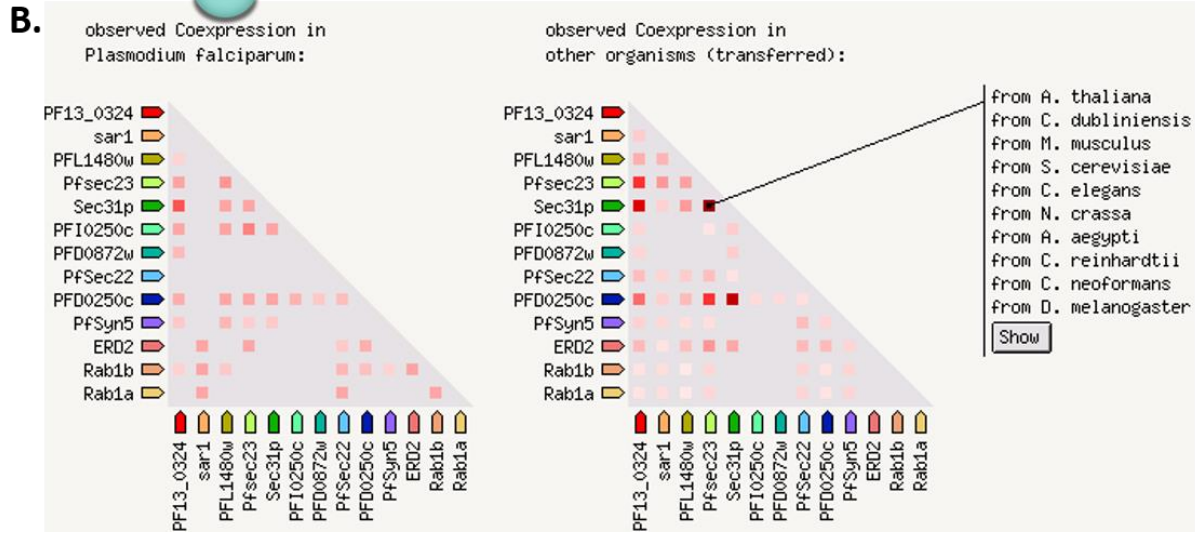

Supplement: Supplementary file [file 14227580]
